# Supplementary material
Source: PubMed Central journal article supplement (PMC7982321)

## SUPPLEMENTAL DATA

### **Mutation of Gly11 on the Dimer Interface Results in the Complete Crystallographic Dimer Dissociation of SARS-CoV 3CL<sup>pro</sup>: Crystal Structure with Molecular Dynamics Simulations**

**Shuai Chen<sup>1§</sup>, Tiancen Hu<sup>1§</sup>, Jian Zhang<sup>1§</sup>, Jing Chen<sup>1</sup>, Kaixian Chen<sup>1</sup>,  
Jianping Ding<sup>2</sup>, Hualiang Jiang<sup>1</sup> and Xu Shen<sup>1</sup>**

From <sup>1</sup>Drug Discovery and Design Center, State Key Laboratory of Drug Research, Shanghai Institute of Materia Medica, Chinese Academy of Sciences, Shanghai 201203, China and <sup>2</sup>State Key Laboratory of Molecular Biology, Institute of Biochemistry and Cell Biology, Shanghai Institutes for Biological Sciences, Chinese Academy of Sciences, Shanghai 200031, China.

Running Title: Crystallographic Dimer Dissociation of SARS-CoV 3CL<sup>pro</sup>

Address Correspondence to: Xu Shen and Hualiang Jiang, Shanghai Institute of Materia Medica, Chinese Academy of Sciences, Shanghai 201203, China, Phone&Fax: +86-21-50806918; E-mail: xshen@mail.shnc.ac.cn and hljiang@mail.shnc.ac.cn

#### SUPPLEMENTAL FIGURE LEGENDS

**Figure S1. Monomer-monomer interactions mediated by the  $\alpha$ -helix A' (residues 10-15) in wild type SARS-CoV 3CL<sup>pro</sup> dimer (PDB code: 1UK3).** The residues involved in the dimer interface are shown as stick models with chain A and B colored in cyan and yellow respectively. The N-terminal finger and  $\alpha$ -helix A' are drawn as cartoon, and the hydrogen bonds between  $\alpha$ -helix A' residues are displayed explicitly.

**Figure S2. CD and fluorescence emission spectra of the Gly11\_Ala mutant and wild type SARS-CoV 3CL<sup>pro</sup>.** (a) Far-UV CD spectra of the Gly11\_Ala mutant and wild type SARS-CoV 3CL<sup>pro</sup> at a 10  $\mu$ M concentration in 10 mM sodium phosphate pH 7.5, 100 mM NaCl at 25 °C (b) Fluorescence emission spectra of the Gly11\_Ala mutant and wild type SARS-CoV 3CL<sup>pro</sup> at 25 °C upon excitation at 280 nm. The samples were prepared in 10 mM Tris-HCl pH 7.5, 100 mM NaCl with a concentration of 3~5  $\mu$ M. The spectra of the wild type protease and Gly11\_Ala mutant are shown in black and light gray, respectively.

**Figure S3. The  $2F_o - F_c$  electron density map around the catalytic dyad in Gly11\_Ala monomer.** The protein is shown as stick model and the residues are indicated. The distance between His41 and Cys145 is also highlighted. The carbon, nitrogen, oxygen and sulfur atoms are colored in green, blue, red and yellow respectively.

**Table S1. Residues involved in the interface between domain III and the rest part of SARS-CoV 3CL<sup>pro</sup> <sup>a</sup>**

| 1UK3_A                               |               | G11A                                 |               |
|--------------------------------------|---------------|--------------------------------------|---------------|
| Interface area: 771.2 Å <sup>2</sup> |               | Interface area: 696.6 Å <sup>2</sup> |               |
| Domain III                           | Other parts   | Domain III                           | Other parts   |
| Hydrogen bonds                       |               | Hydrogen bonds                       |               |
| ASN 238[ O ] <sup>b</sup>            | THR 199[ N ]  | ASN 238[ O ]                         | THR 199[ N ]  |
| ASN 238[ ND2]                        | ASP 197[ O ]  | ASN 238[ ND2]                        | ASP 197[ OD2] |
| GLU 240[ N ]                         | THR 199[ O ]  | ASN 238[ ND2]                        | ASP 197[ O ]  |
| GLU 288[ OE2]                        | LYS 5 [ NZ ]  | GLU 240[ N ]                         | THR 199[ O ]  |
| ASP 289[ OD1]                        | ARG 131[ NH2] | GLU 240[ OE2]                        | ARG 131[ NH1] |
| GLU 290[ OE1]                        | LYS 5 [ NZ ]  | ASP 289[ OD1]                        | LYS 137[ NZ ] |
| ASP 295[ OD2]                        | THR 111[ OG1] | ASP 289[ OD1]                        | ILE 200[ N ]  |
|                                      |               | ASP 289[ OD2]                        | LYS 137[ NZ ] |
|                                      |               | GLU 290[ O ]                         | LYS 5 [ NZ ]  |
|                                      |               | GLU 290[ OE2]                        | SER 139[ N ]  |
|                                      |               | GLU 290[ OE1]                        | SER 139[ N ]  |
|                                      |               | GLU 290[ OE1]                        | SER 139[ OG ] |
|                                      |               | ASP 295[ OD2]                        | LYS 5 [ NZ ]  |
| Salt bridges                         |               | Salt bridges                         |               |
| GLU 288[ OE2]                        | LYS 5 [ NZ ]  | GLU 240[ OE2]                        | ARG 131[NH1]  |
| ASP 289[ OD1]                        | ARG 131[ NH1] | ASP 289[ OD1]                        | LYS 137[ NZ ] |
| ASP 289[ OD1]                        | ARG 131[ NH2] | ASP 289[ OD2]                        | LYS 137[ NZ ] |
| ASP 289[ OD2]                        | ARG 131[ NH2] | GLU 290[ OE2]                        | LYS 5 [ NZ ]  |
| GLU 290[ OE1]                        | LYS 5 [ NZ ]  | ASP 295[ OD2]                        | LYS 5 [ NZ ]  |
| GLU 290[ OE2]                        | ARG 131[ NE ] |                                      |               |

<sup>a</sup>The interface between domain III and the rest part of the protease was determined by the EBI PISA web server ([http://www.ebi.ac.uk/msd-srv/prot\\_int/picite.html](http://www.ebi.ac.uk/msd-srv/prot_int/picite.html)).

<sup>b</sup> Atoms in the parenthesis are those involved in forming the corresponding bonds.

Figure S1

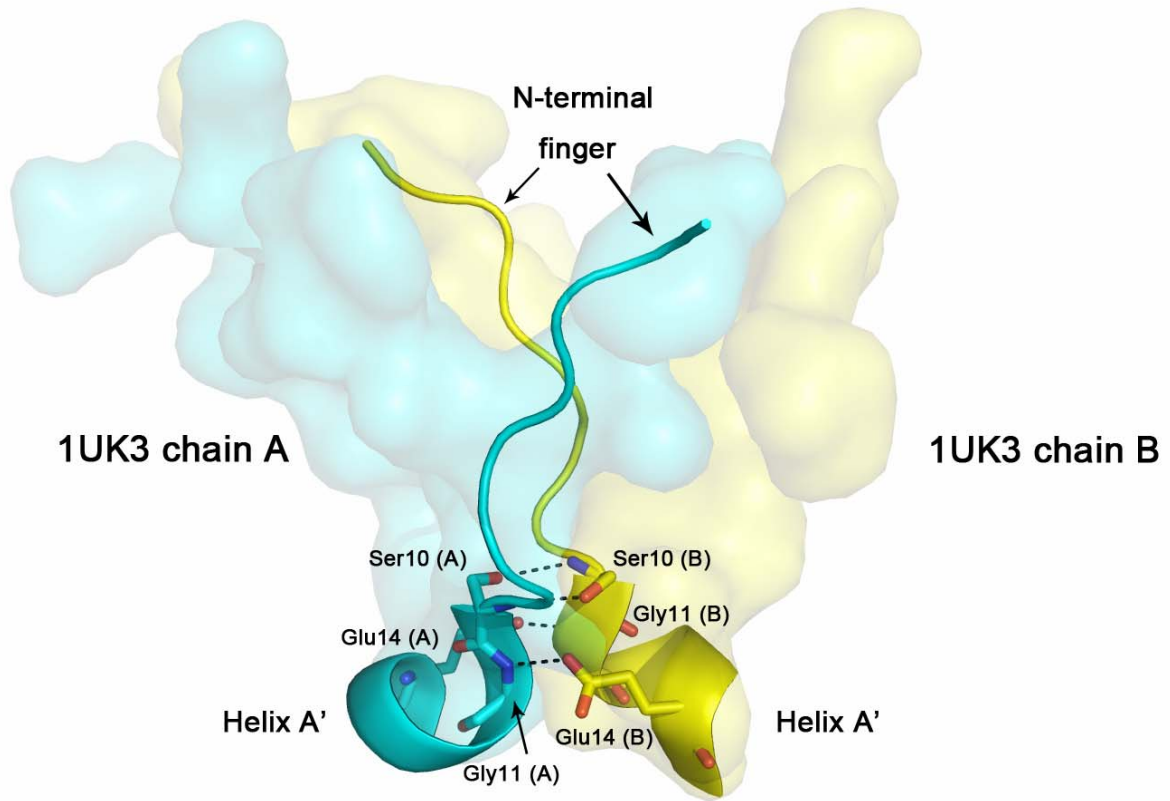

Figure S2

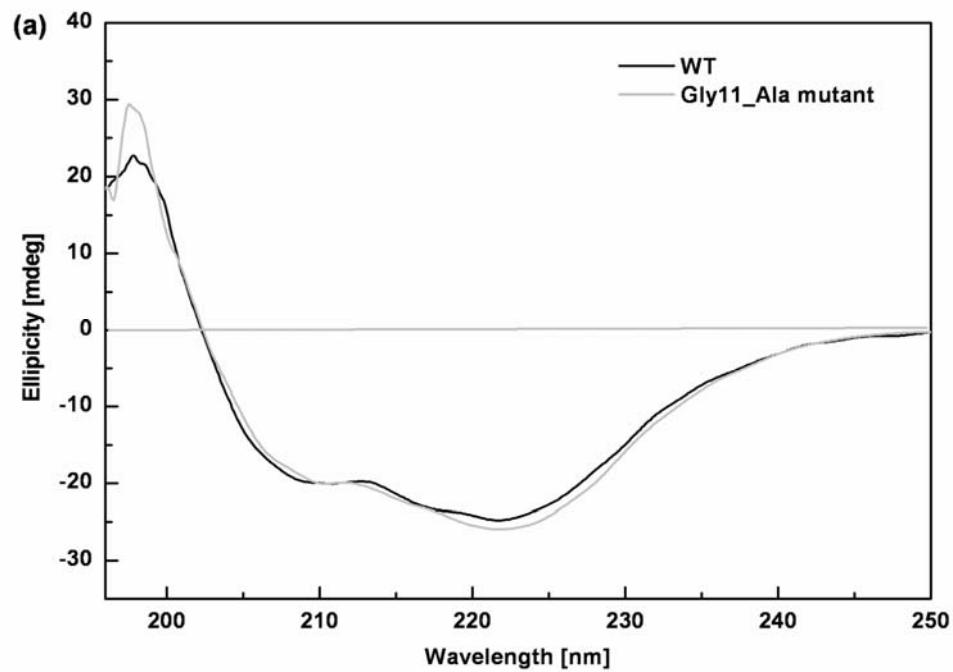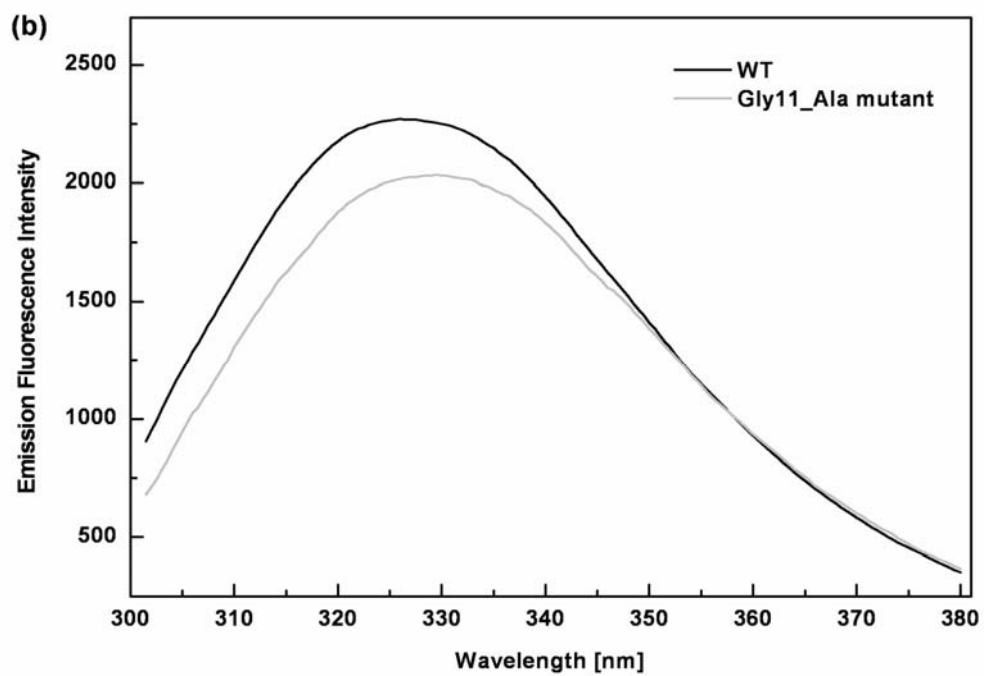

**Figure S3**

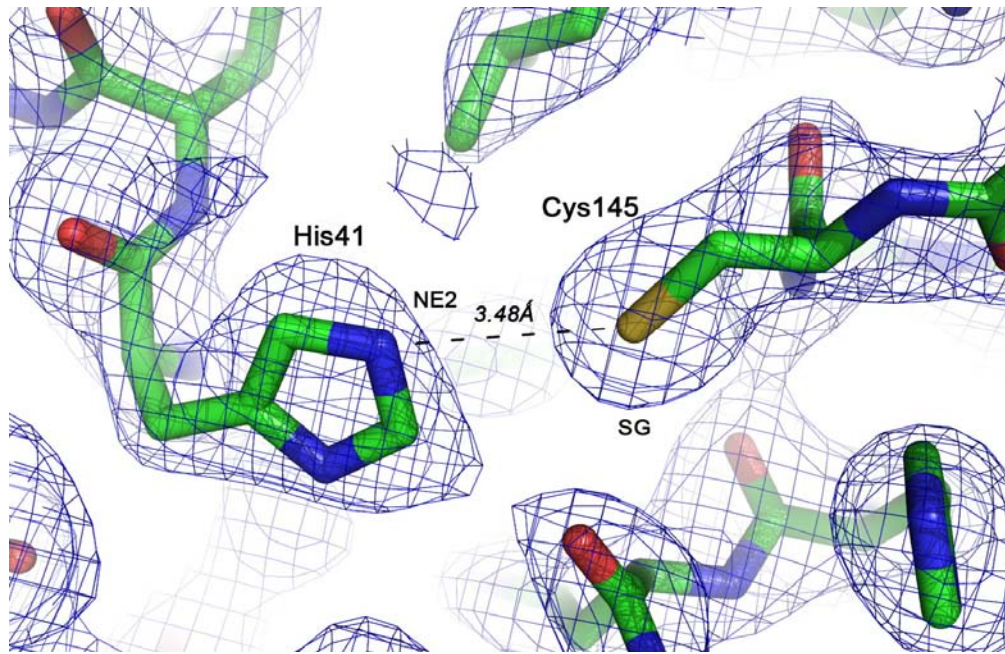

Supplement: mmc1.pdf [file mmc1.pdf]
